# Supplementary material for: 16S-FASAS: an integrated pipeline for synthetic full-length 16S rRNA gene sequencing data analysis
Source: PubMed Central journal article supplement (PMC9511998; doi:10.7717/peerj.14043), 2022-09-23

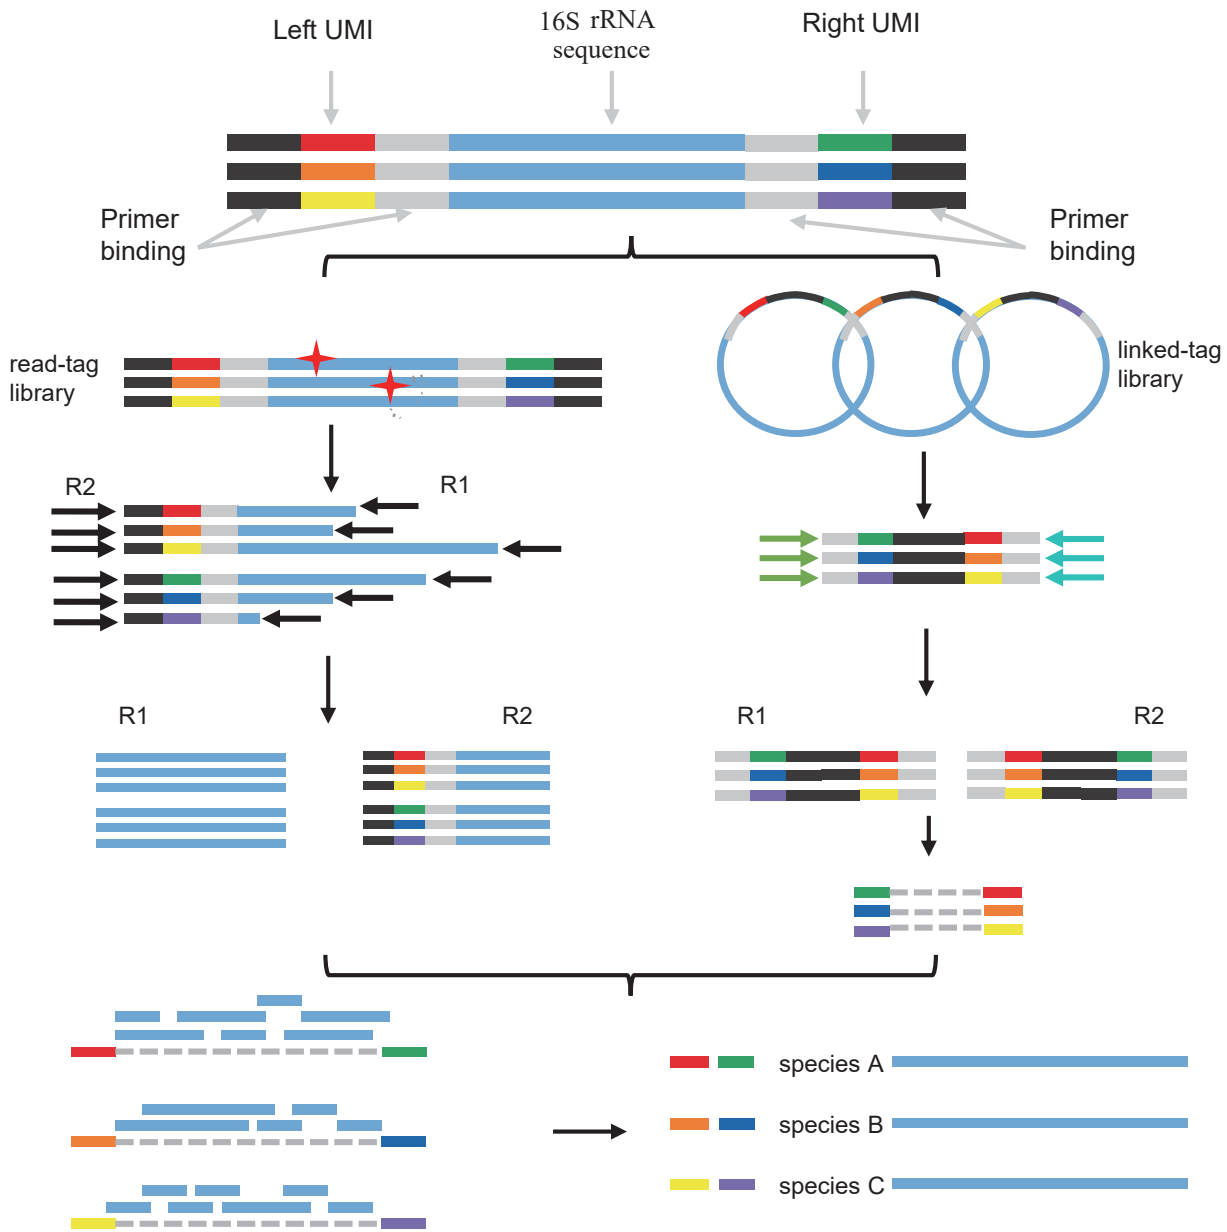

Supplement: peerj-10-14043-s001.pdf [file peerj-10-14043-s001.pdf]
