# Supplementary material for: 16S-FASAS: an integrated pipeline for synthetic full-length 16S rRNA gene sequencing data analysis
Source: PeerJ. 2022 Sep 23;10:e14043. doi: 10.7717/peerj.14043 (PMC9511998; doi:10.7717/peerj.14043)
Supplement: Table S1 [file peerj-10-14043-s002.xlsx]

## Sheet: Table S1
Supplementary Table 1 Expected composition and percentage of microbial species in mock samples
Scientific Name	mock1	mock2	mock3	mock4
Enterococcus faecium	0.142857	0.024325	-	0.000300723
Haemophilus influenzae	0.142857	0.24325	-	-
Klebsiella pneumoniae	0.142857	0.24325	-	-
Staphylococcus aureus	0.142857	0.24325	-	0.0309927
Stenotrophomonas maltophilia	0.142857	0.24325	-	-
Streptococcus mutans	0.142857	0.0024325	-	0.37352
Escherichia coli	0.142857	0.00024325	0.1522	-
Fusobacterium nucleatum	-	-	0.0507	-
Lactobacillus gasseri	-	-	0.1014	-
Cutibacterium acnes	-	-	0.0435	-
Enterococcus faecalis	-	-	0.0927	-
Bacteroides fragilis	-	-	0.1536	-
Clostridium butyricum	-	-	0.1014	-
Bacteroides thetaiotaomicron	-	-	0.2029	-
Enterobacter hormaechei	-	-	0.0507	-
Clostridium beijerinckii	-	-	0.0507	-
Bifidobacterium bifidum	-	-	0.0001	-
Salmonella enterica	-	-	-	0.0214604
Pseudomonas aeruginosa	-	-	-	0.088936
Proteus vulgaris	-	-	-	0.258578
Streptococcus pneumoniae	-	-	-	0.00281653
Acinetobacter baumannii	-	-	-	0.221094
Lactobacillus acidophilus	-	-	-	0.000297473
Gluconobacter oxydans	-	-	-	0.00200447
