# Supplementary material for: 16S-FASAS: an integrated pipeline for synthetic full-length 16S rRNA gene sequencing data analysis
Source: PeerJ. 2022 Sep 23;10:e14043. doi: 10.7717/peerj.14043 (PMC9511998; doi:10.7717/peerj.14043)
Supplement: Table S3 [file peerj-10-14043-s004.xlsx]

## Sheet: Table S3
Supplementary Table 3 Contig assembly statistics of mock samples
sample	contigs (>= 1200 bp)	contigs (>= 1500 bp)	Largest contig	GC (%)	N50	N75
mock1	3602	8	1510	53.09	1474	1464
mock2	1251	4	1505	52.68	1469	1464
mock3	3339	0	1495	53.85	1264	1233
mock4	25856	18	1542	52.94	1381	1344
