# Supplementary material for: 16S-FASAS: an integrated pipeline for synthetic full-length 16S rRNA gene sequencing data analysis
Source: PeerJ. 2022 Sep 23;10:e14043. doi: 10.7717/peerj.14043 (PMC9511998; doi:10.7717/peerj.14043)
Supplement: Table S6 [file peerj-10-14043-s007.xlsx]

## Sheet: Table S6
Supplementary Table 6 Species abundance of mock samples from USEARCH-based
Scientific Name	Theoretical_mock1	mock1	Theoretical_mock2	mock2	Theoretical_mock3	mock3	Theoretical_mock4	mock4
d:Bacteria,p:Bacteroidetes,c:Bacteroidia,o:Bacteroidales,f:Bacteroidaceae,g:Bacteroides,s:Bacteroides_fragilis		0		0	0.1536	0.118798		0
d:Bacteria,p:Bacteroidetes,c:Bacteroidia,o:Bacteroidales,f:Bacteroidaceae,g:Bacteroides		0		0		0.0339536		0
d:Bacteria,p:Firmicutes,c:Clostridia,o:Clostridiales,f:Clostridiaceae,g:Clostridium,s:Clostridium_butyricum		0		0	0.1014	0.081849		0
d:Bacteria,p:Firmicutes,c:Clostridia,o:Clostridiales,f:Clostridiaceae,g:Clostridium		0		0		0		0
d:Bacteria,p:Firmicutes,c:Clostridia,o:Clostridiales,f:Clostridiaceae,g:Clostridium,s:Clostridium_acetobutylicum		0		0		0.0328933		0
d:Bacteria;p:Firmicutes;c:Clostridia;o:Clostridiales;f:Clostridiaceae;g:Clostridium;s:Clostridium beijerinckii		0		0	0.0507	0		0
d:Bacteria,p:Proteobacteria,c:Gammaproteobacteria,o:Enterobacterales,f:Enterobacteriaceae		0.0525432		0.00178891		0.0443172		0
d:Bacteria,p:Firmicutes,c:Bacilli,o:Lactobacillales,f:Enterococcaceae,g:Enterococcus,s:Enterococcus_faecalis		0		0	0.0927	0.276426		0
d:Bacteria,p:Actinobacteria,c:Actinobacteria,o:Propionibacteriales,f:Propionibacteriaceae,g:Cutibacterium,s:Cutibacterium_acnes		0		0	0.0435	0.0597699		0
d:Bacteria,p:Proteobacteria,c:Gammaproteobacteria,o:Enterobacterales,f:Enterobacteriaceae,g:Enterobacter		0		0	0.0507	0.0272477		0
Bacteria;Proteobacteria;Gammaproteobacteria;Enterobacterales;Enterobacteriaceae;Escherichia;Escherichia fergusonii		0		0		0.0991571		0
d:Bacteria,p:Bacteroidetes,c:Bacteroidia,o:Bacteroidales,f:Bacteroidaceae,g:Bacteroides,s:Bacteroides_thetaiotaomicron		0		0	0.2029	0.163459		0
Bacteria;Proteobacteria;Gammaproteobacteria;Enterobacterales;Enterobacteriaceae;Shigella;Shigella sonnei		0		0		0	0.088936	0.238852
d:Bacteria,p:Proteobacteria,c:Gammaproteobacteria,o:Enterobacterales,f:Enterobacteriaceae,g:Salmonella,s:Salmonella_enterica		0		0		0	0.0214604	0.00410449
d:Bacteria,p:Firmicutes,c:Bacilli,o:Lactobacillales,f:Streptococcaceae,g:Streptococcus,s:Streptococcus_mutans	0.142857	0.252159	0.0024325	0		0	0.37352	0.349702
d:Bacteria,p:Proteobacteria,c:Alphaproteobacteria,o:Rhodospirillales,f:Acetobacteraceae,g:Gluconobacter		0		0		0		0.00187634
d:Bacteria,p:Firmicutes,c:Bacilli,o:Lactobacillales,f:Streptococcaceae,g:Streptococcus,s:Streptococcus_pneumoniae		0		0		0	0.00281653	0.00187634
d:Bacteria,p:Proteobacteria,c:Gammaproteobacteria,o:Pseudomonadales,f:Moraxellaceae,g:Acinetobacter,s:Acinetobacter_baumannii		0		0		0	0.221094	0.271864
d:Bacteria,p:Proteobacteria,c:Gammaproteobacteria,o:Enterobacterales,f:Morganellaceae,g:Proteus,s:Proteus_hauseri		0		0		0		0.096045
d:Bacteria;p:Proteobacteria;c:Gammaproteobacteria;o:Enterobacterales;f:Morganellaceae;f:Proteus;s:Proteus vulgaris		0		0			0.258578	0
d:Bacteria,p:Firmicutes,c:Bacilli,o:Bacillales,f:Staphylococcaceae,g:Staphylococcus,s:Staphylococcus_aureus	0.142857	0.200576	0.24325	0.570066		0	0.0309927	0.0356797
d:Bacteria,p:Proteobacteria,c:Gammaproteobacteria,o:Enterobacterales,f:Enterobacteriaceae,g:Escherichia	0.142857	0.0302303	0.00024325	0	0.1522	0		0
d:Bacteria,p:Proteobacteria,c:Gammaproteobacteria,o:Pasteurellales,f:Pasteurellaceae,g:Haemophilus,s:Haemophilus_influenzae	0.142857	0.0165547	0.24325	0.0357782		0		0
d:Bacteria,p:Firmicutes,c:Bacilli,o:Lactobacillales,f:Enterococcaceae,g:Enterococcus,s:Enterococcus_faecium	0.142857	0.106766	0.024325	0		0	0.000300723	0
d:Bacteria,p:Firmicutes,c:Bacilli,o:Lactobacillales,f:Enterococcaceae,g:Enterococcus		0.170345		0.0614192		0.0621289		0
d:Bacteria,p:Proteobacteria,c:Gammaproteobacteria,o:Enterobacterales,f:Enterobacteriaceae,g:Klebsiella,s:Klebsiella_pneumoniae	0.142857	0.00263916	0.24325	0		0		0
d:Bacteria,p:Proteobacteria,c:Gammaproteobacteria,o:Enterobacterales,f:Enterobacteriaceae,g:Klebsiella		0.0160749		0.0387597		0		0
d:Bacteria,p:Proteobacteria,c:Gammaproteobacteria,o:Xanthomonadales,f:Xanthomonadaceae,g:Stenotrophomonas,s:Stenotrophomonas_maltophilia	0.142857	0.152111	0.24325	0.288014		0		0
d:Bacteria,p:Proteobacteria,c:Gammaproteobacteria,o:Xanthomonadales		0		0.00417412		0		0
d:Bacteria;p:Fusobacteria;c:Fusobacteriia;o:Fusobacteriales;f:Fusobacteriaceae;g:Fusobacterium;s:Fusobacterium nucleatum		0		0	0.0507	0		0
d:Bacteria;p:Actinobacteria;c:Actinobacteria;o:Bifidobacteriales;f:Bifidobacteriaceae;g:Bifidobacterium;s:Bifidobacterium bifidum		0		0	0.0001	0		0
d:Bacteria;p:Firmicutes;c:Bacilli;o:Lactobacillales;f:Lactobacillaceae;g:Lactobacillus;s:Lactobacillus gasseri		0		0	0.1014	0	0.000297473	0
d:Bacteria;p:Proteobacteria;c:Alphaproteobacteria;o:Rhodospirillales;f:Acetobacteraceae;g:Gluconobacter;s:Gluconobacter oxydans		0		0		0	0.00200447	0
